# Supplementary material
Source: PubMed Central journal article supplement (PMC5711437)
Supplement: NIHMS921591-supplement-Supplementary_Information.pdf [file NIHMS921591-supplement-Supplementary_Information.pdf]

## Supporting Information

### Dioxygen Activation and O-O Bond Formation Reactions by Manganese Corroles

Mian Guo,<sup>†</sup> Yong-Min Lee,<sup>†</sup> Ranjana Gupta,<sup>†</sup> Mi Sook Seo,<sup>†</sup> Takehiro Ohta,<sup>‡</sup>  
Hua-Hua Wang,<sup>§</sup> Hai-Yang Liu,<sup>§</sup> Sunder N. Dhuri,<sup>†,‡</sup> Ritimukta Sarangi,<sup>&,\*</sup> Shunichi  
Fukuzumi,<sup>†,\*</sup> and Wonwoo Nam<sup>†,¶,\*</sup>

<sup>†</sup> *Department of Chemistry and Nano Science, Ewha Womans University, Seoul 03760, Korea*

<sup>‡</sup> *Picobiology Institute, Graduate School of Life Science, University of Hyogo, RSC-UH LP  
Center, Hyogo 679-5148, Japan*

<sup>§</sup> *Department of Chemistry, South China University of Technology, Guangzhou 510641,  
China*

<sup>#</sup> *Department of Chemistry, Goa University, Goa 403 206, India*

<sup>&</sup> *Stanford Synchrotron Radiation Lightsource, SLAC National Accelerator Laboratory,  
Menlo Park, CA 94025, USA*

<sup>¶</sup> *State Key Laboratory for Oxo Synthesis and Selective Oxidation, Lanzhou Institute of  
Chemical Physics, Chinese Academy of Sciences, Lanzhou 730000, China*

\* E-mail: wwnam@ewha.ac.kr, fukuzumi@chem.eng.osaka-u.ac.jp,  
ritis@slac.stanford.edu

## Table of Contents

|            |     |
|------------|-----|
| Table S1   | S3  |
| Figure S1  | S4  |
| Figure S2  | S5  |
| Figure S3  | S6  |
| Figure S4  | S7  |
| Figure S5  | S8  |
| Figure S6  | S9  |
| Figure S7  | S10 |
| Figure S8  | S11 |
| Figure S9  | S12 |
| Figure S10 | S13 |
| Figure S11 | S14 |
| Figure S12 | S15 |
| Figure S13 | S16 |
| Figure S14 | S17 |
| Figure S15 | S18 |
| Figure S16 | S19 |
| Figure S17 | S20 |
| Figure S18 | S21 |
| Figure S19 | S22 |
| Figure S20 | S23 |
| Figure S21 | S24 |
| Figure S22 | S25 |
| Figure S23 | S26 |
| References | S27 |

**Table S1.** EXAFS Least Squares Fitting Results

| complex                    | coordination/path | $R(\text{\AA})^a$ | $\sigma^2(\text{\AA}^2)^b$ | $E_0$ (eV) | $F^c$ |
|----------------------------|-------------------|-------------------|----------------------------|------------|-------|
| [(TPFC)Mn <sup>III</sup> ] | 4 Mn-N            | 1.91              | 470                        | -2.76      | 0.09  |
|                            | 6 Mn-C            | 2.89              | 863                        |            |       |
|                            | 12 Mn-C-N         | 3.15              | 114                        |            |       |
|                            | 4 Mn-C-N          | 3.66              | 938                        |            |       |
|                            | 8 Mn-C            | 4.23              | 575                        |            |       |
|                            | 8 Mn-C-N          | 4.78              | 617                        |            |       |
| <b>2</b>                   | 2 Mn-O            | 1.83              | 411                        | -1.43      | 0.15  |
|                            | 4 Mn-N            | 1.96              | 329                        |            |       |
|                            | 6 Mn-C            | 2.88              | 752                        |            |       |
|                            | 16 Mn-C-N         | 3.15              | 312                        |            |       |
|                            | 8 Mn-C-N          | 4.11              | 575                        |            |       |
|                            | 8 Mn-C            | 4.67              | 1208                       |            |       |

<sup>a</sup> The estimated standard deviations for the distances are in the order of  $\pm 0.02$  Å. <sup>b</sup> The  $\sigma^2$  values are multiplied by  $10^5$ . <sup>c</sup> Error is given by  $\Sigma[(\chi_{\text{obsd}} - \chi_{\text{calcd}})^2 k^6] / \Sigma[(\chi_{\text{obsd}})^2 k^6]$ . The  $S_0^2$  factor was set at 1.

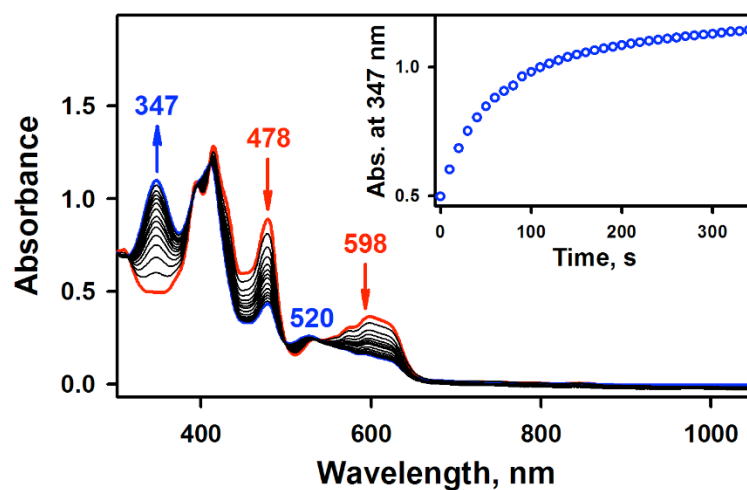

**Figure S1.** UV-vis spectral changes observed for the formation of **1** (blue line) in the O<sub>2</sub>-activation by [(TPFC)Mn<sup>III</sup>] (0.030 mM, red line) in the presence of TMAH (0.030 mM) under an air atmosphere in THF at 25 °C. Inset shows the time trace monitored at 347 nm due to the formation of **1**.

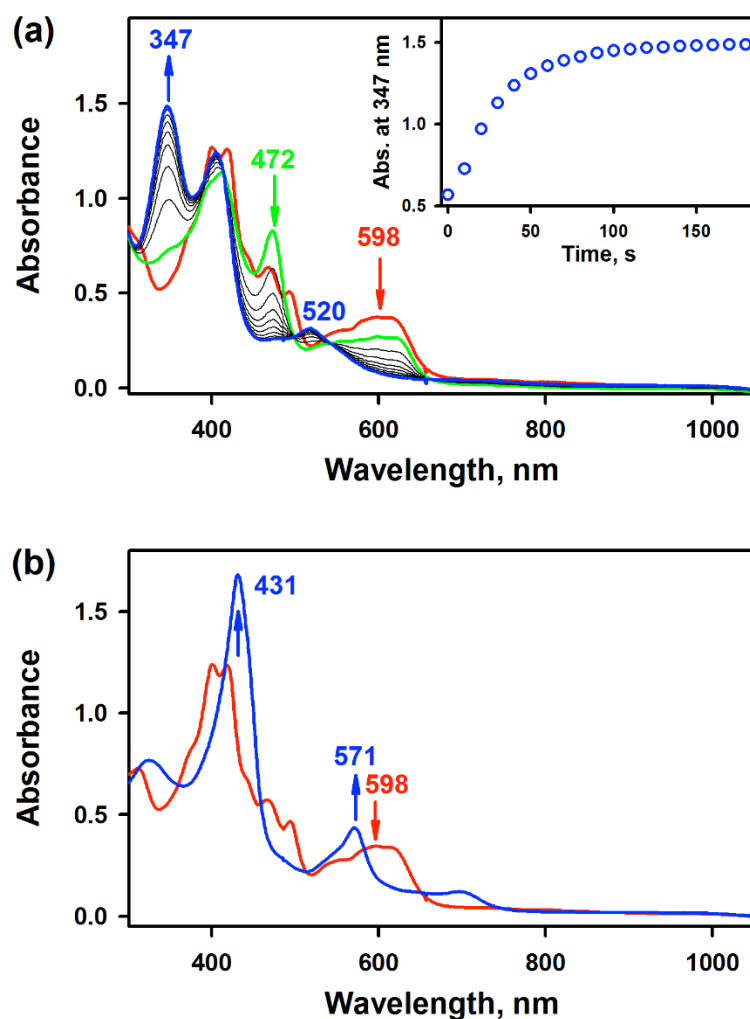

**Figure S2.** (a) UV-vis spectral changes observed in the reaction of  $[(\text{TPFC})\text{Mn}^{\text{III}}]$  (red line; 0.030 mM) and 1-(*tert*-butylsulfonyl)-2-iodosylbenzene ( $^{\text{s}}\text{PhIO}$ , 0.060 mM) to form  $[(\text{TPFC})\text{Mn}^{\text{V}}(\text{O})]$  species (**1**; blue line) through the intermediacy of green line spectrum in  $\text{CH}_3\text{CN}$  at 0 °C. Inset shows the time course monitored at 347 nm due to the formation of **1**. (b) UV-vis spectral changes observed in the reaction of  $[(\text{TPFC})\text{Mn}^{\text{III}}]$  (red line; 0.030 mM) and  $\text{H}_2\text{O}_2$  (0.12 mM) in the presence of tetramethylammonium hydroxide (TMAH; 0.60 mM) to form  $[(\text{TPFC})\text{Mn}^{\text{IV}}(\text{O}_2)]^-$  species (**2**; blue line) immediately in  $\text{CH}_3\text{CN}$  at 0 °C.

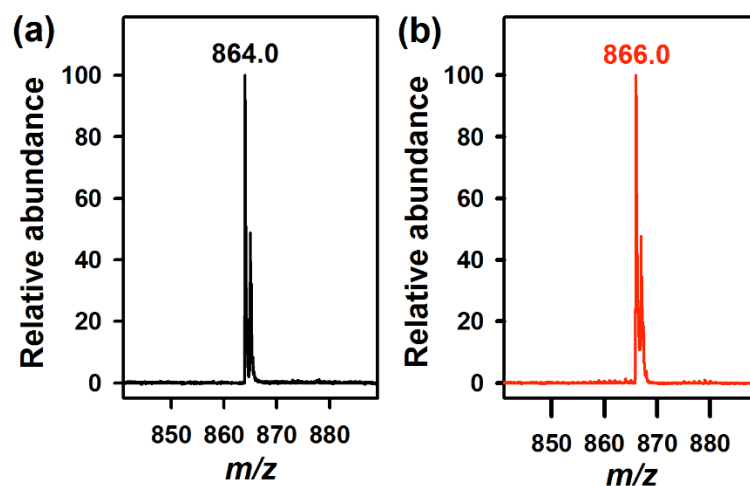

**Figure S3.** CSI-MS spectra of (a)  $1\text{-}^{16}\text{O}$  and (b)  $1\text{-}^{18}\text{O}$  recorded in positive mode. The peaks at  $m/z = 864.0$  and  $866.0$  together with their isotope distribution patterns correspond to  $[(\text{TPFC})\text{Mn}(^{16}\text{O})]$  (calcd.  $m/z = 864.0$ ) and  $[(\text{TPFC})\text{Mn}(^{18}\text{O})]$  (calcd.  $m/z = 866.0$ ), respectively.

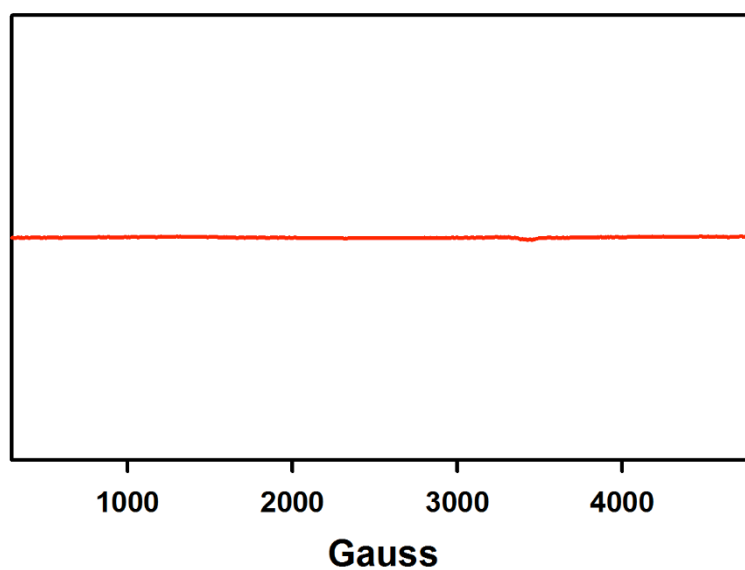

**Figure S4.** X-band CW-EPR spectrum of **1** produced in the O<sub>2</sub>-activation reaction by [(TPFC)Mn<sup>III</sup>] (0.10 mM) with O<sub>2</sub> in the presence of TMAH (0.20 mM) in tetrahydrofuran (THF) at 25 °C. Spectrum was recorded at 5 K.

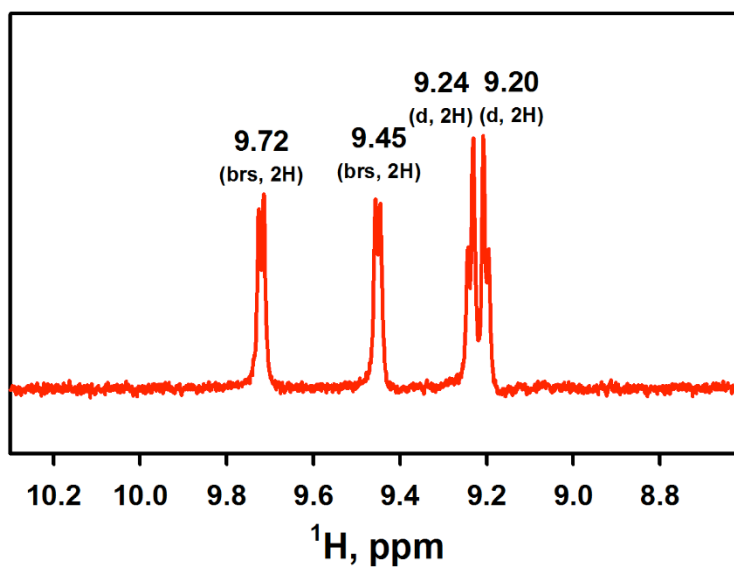

**Figure S5.**  $^1\text{H}$  NMR spectrum of **1** in  $\text{CD}_3\text{CN}$  at  $-10\text{ }^\circ\text{C}$ . Chemical shifts ( $\delta = 9.72$ , 9.45, 9.24 and 9.20 ppm) are quite similar to the reported values ( $\delta = 9.6$ , 9.3, 9.12 and 9.06 ppm) of **1** in  $\text{CD}_2\text{Cl}_2$  at  $-80\text{ }^\circ\text{C}$ .<sup>S1</sup>

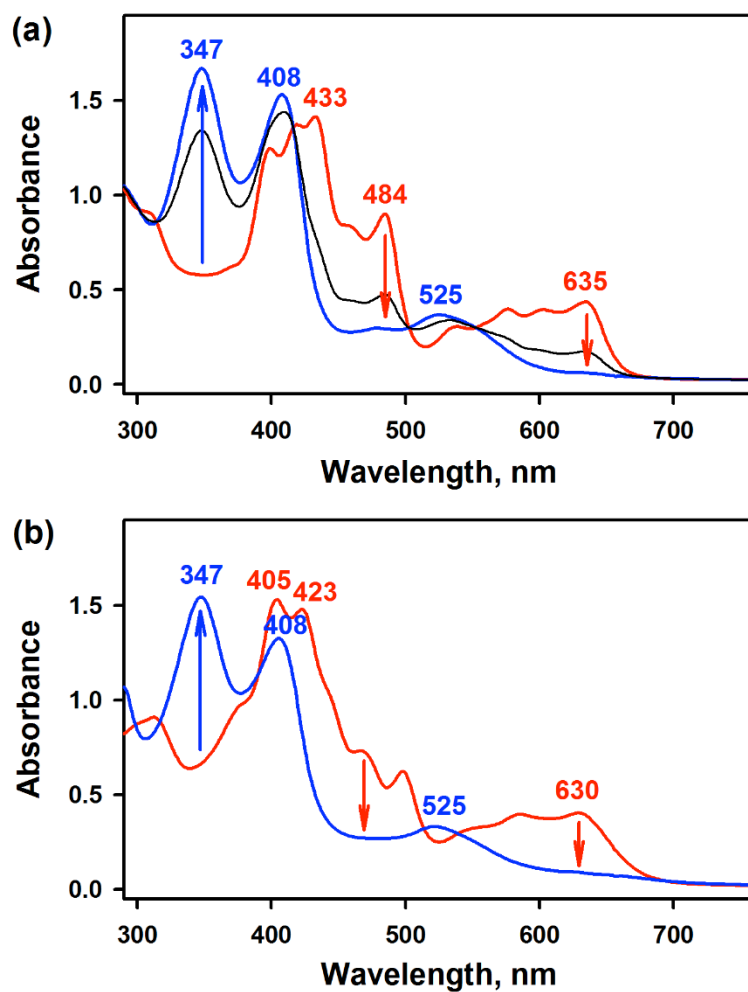

**Figure S6.** (a) UV-vis spectral changes showing the formation of  $[(\text{TPFcCN})\text{Mn}^{\text{V}}(\text{O})]$  (blue line) in the  $\text{O}_2$ -activation reaction by  $[(\text{TPFcCN})\text{Mn}^{\text{III}}]$  (0.030 mM; red line) with  $\text{O}_2$  in the presence of TMAH (0.060 mM) under an air atmosphere in THF at 25 °C. (b) UV-vis spectral changes showing the immediate formation of  $[(\text{TPFcCN})\text{Mn}^{\text{IV}}(\text{O})]$  (blue line) in the reaction of  $[(\text{TPFcCN})\text{Mn}^{\text{III}}]$  (0.030 mM; red line) and  $^s\text{PhIO}$  (0.060 mM) in  $\text{CH}_3\text{CN}$  at 0 °C.

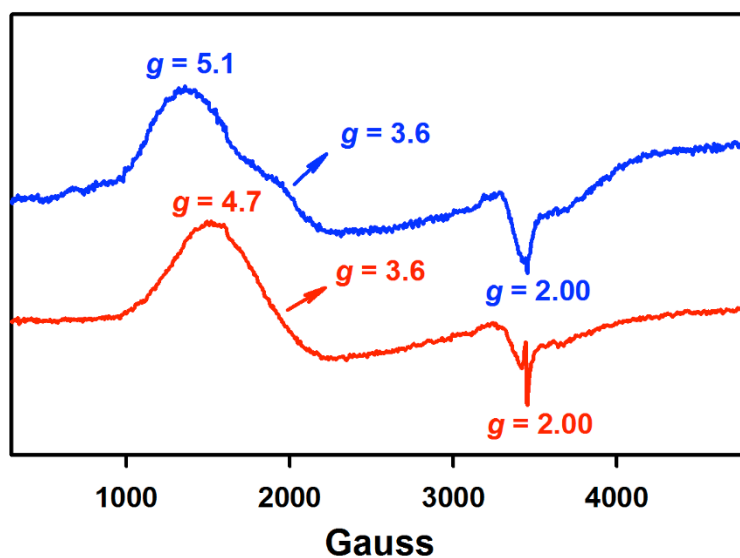

**Figure S7.** X-band CW-EPR spectra of  $[(\text{TPFC})\text{Mn}^{\text{IV}}(\text{O}_2)]^-$  (**2**; blue line) and  $[(\text{TPFcCN})\text{Mn}^{\text{IV}}(\text{O}_2)]^-$  (red line) generated in the  $\text{O}_2$ -activation reaction by  $[(\text{TPFC})\text{Mn}^{\text{III}}]$  (0.50 mM) and  $[(\text{TPFcCN})\text{Mn}^{\text{III}}]$  (0.50 mM), respectively, with  $\text{O}_2$  in the presence of TMAH (10 mM) under an air atmosphere in THF at 25 °C. Spectra were recorded at 5 K.

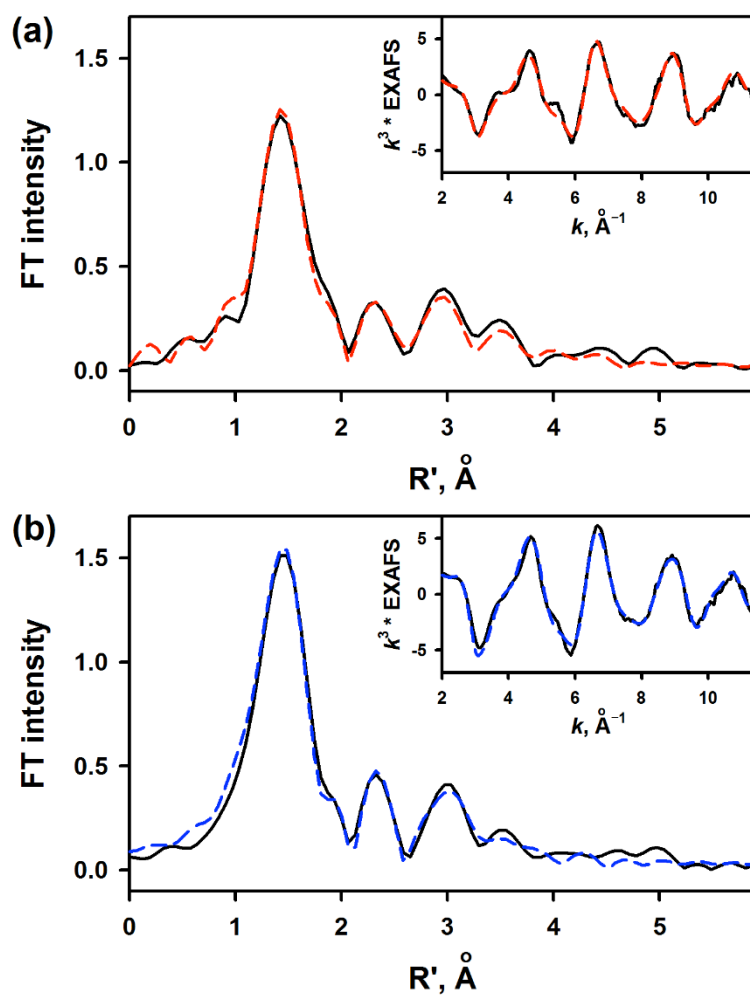

**Figure S8.** (a) FEFF best-fits to the Fourier Transform and EXAFS data (inset) for [Mn<sup>III</sup>(TPFC)]: experimental data (black solid line) and fit (red dashed line). (b) FEFF best-fits to the Fourier Transform and EXAFS data (inset) for **2**: experimental data (black solid line) and fit (blue dashed line).

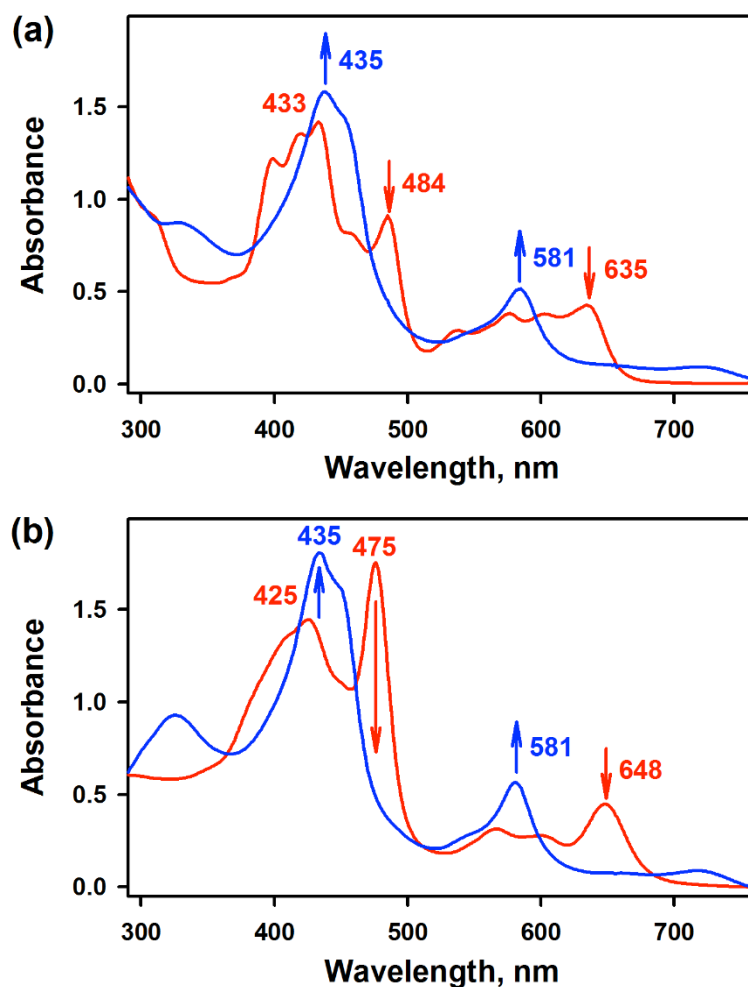

**Figure S9.** (a) UV-vis spectral changes observed in the  $\text{O}_2$ -activation reaction by  $[(\text{TPFcCN})\text{Mn}^{\text{III}}]$  (0.030 mM; red line) with  $\text{O}_2$  in the presence of TMAH (0.60 mM) to form  $[(\text{TPFcCN})\text{Mn}^{\text{IV}}(\text{O}_2)]^-$  (blue line) immediately under an air atmosphere in THF at 25 °C. (b) UV-vis spectral changes observed in the reaction of  $[(\text{TPFcCN})\text{Mn}^{\text{III}}(\text{OH})]^-$  (0.030 mM; red line), which was produced by adding TMAH (0.60 mM) to a  $\text{CH}_3\text{CN}$  solution of  $[(\text{TPFcCN})\text{Mn}^{\text{III}}]$  (0.030 mM) and  $\text{H}_2\text{O}_2$  (0.12 mM) to form  $[(\text{TPFcCN})\text{Mn}^{\text{IV}}(\text{O}_2)]^-$  (blue line) immediately at 0 °C.

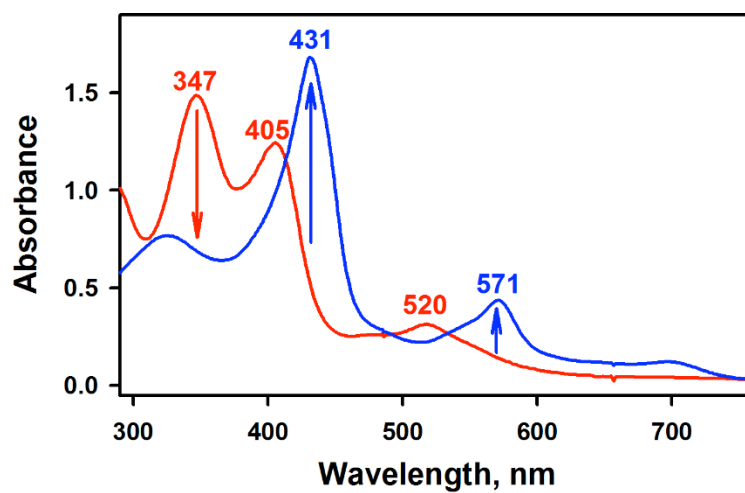

**Figure S10.** UV-vis spectral changes observed in the conversion of **1** (0.030 mM, red line) to **2** (blue line) upon addition of TMAH (0.60 mM) to a CH<sub>3</sub>CN solution of **1** at 0 °C.

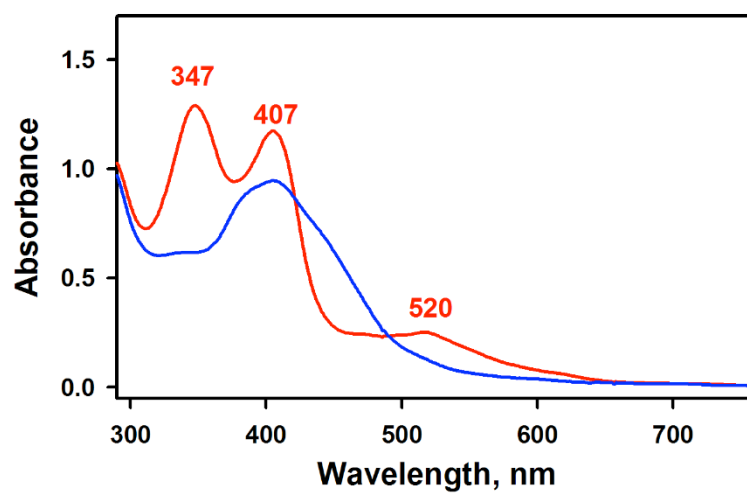

**Figure S11.** UV-vis spectral changes observed upon addition of  $\text{HClO}_4$  (0.060 mM) to a  $\text{CH}_3\text{CN}$  solution **1** (red line; 0.030 mM) at  $0^\circ\text{C}$ , corresponding to the immediate formation of the decomposed product.<sup>S2</sup>

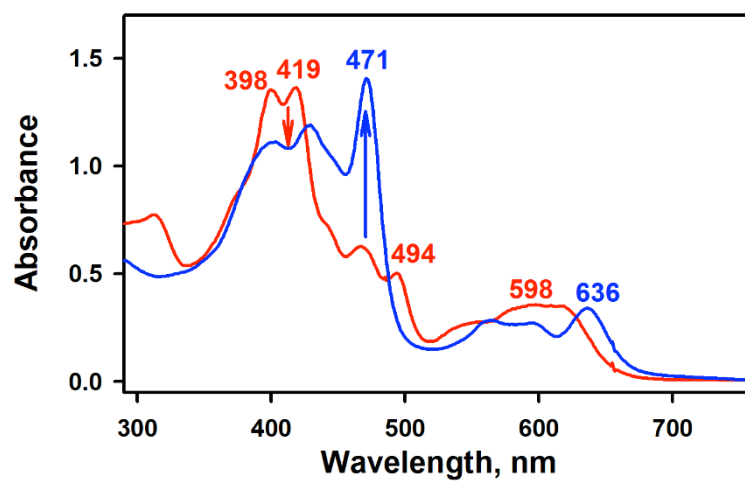

**Figure S12.** UV-vis spectral change observed for the formation of **3** (blue line) upon addition of TMAH (0.60 mM) to a CH<sub>3</sub>CN solution of [(TPFC)Mn<sup>III</sup>] (0.030 mM, red line) at 25 °C.

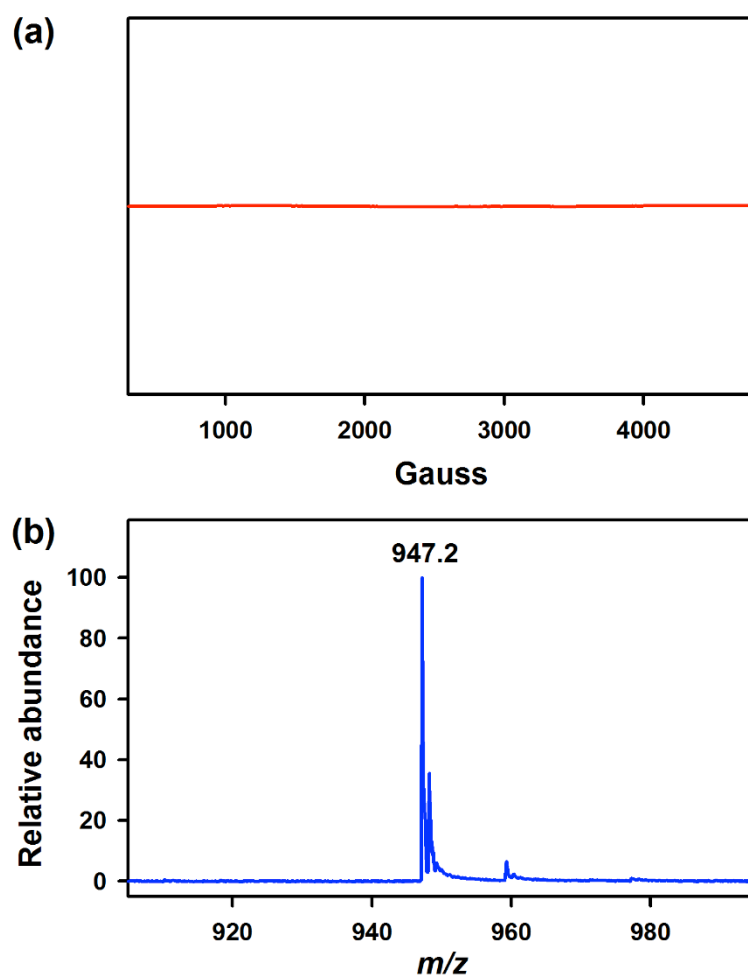

**Figure S13.** (a) X-band EPR spectrum of  $[(\text{TPFC})\text{Mn}^{\text{III}}(\text{OH})]^-$  (**3**) produced by adding TMAH (10 mM) to a  $\text{CH}_3\text{CN}$  solution of  $[(\text{TPFC})\text{Mn}^{\text{III}}]$  (0.50 mM) at 0 °C. Spectrum was recorded at 5 K. (b) CSI-MS spectrum of **3** (0.030 mM) recorded in negative mode in  $\text{CH}_3\text{CN}$ . The peak at  $m/z = 947.2$  corresponds to  $[(\text{TPFC})\text{Mn}^{\text{III}}(\text{OH})(\text{CH}_3\text{CN})_2]^-$  (calcd.  $m/z = 947.0$ ).

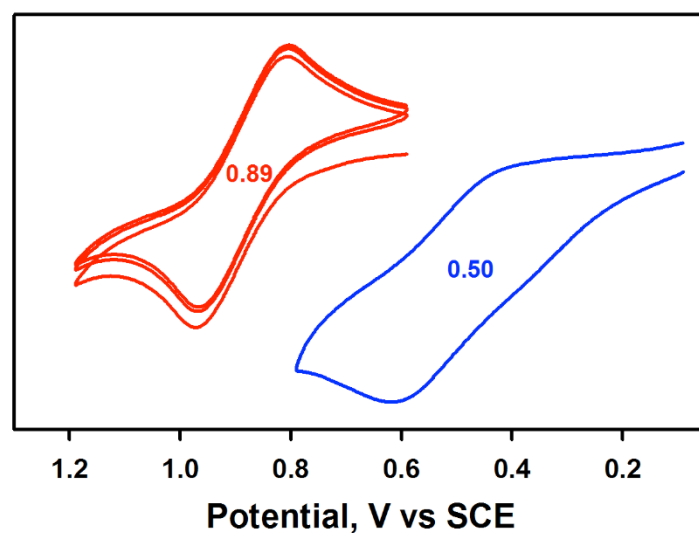

**Figure S14.** Cyclic voltammograms of  $[(\text{TPFC})\text{Mn}^{\text{III}}]$  (2.0 mM) in the absence (red line) and presence (blue line) of TMAH (4.0 mM) under an Ar atmosphere in THF at 25 °C. The one-electron oxidation potential of  $[(\text{TPFC})\text{Mn}^{\text{III}}]$  (2.0 mM) exhibited a significant negative shift from 0.89 V vs SCE in the absence of TMAH to 0.50 V vs SCE in the presence of TMAH (4.0 mM). This negative shift may result from the binding of  $\text{OH}^-$  to the one-electron oxidized  $[(\text{TPFC})\text{Mn}^{\text{IV}}]^+$  species, which is much more acidic than  $[(\text{TPFC})\text{Mn}^{\text{III}}]$ .

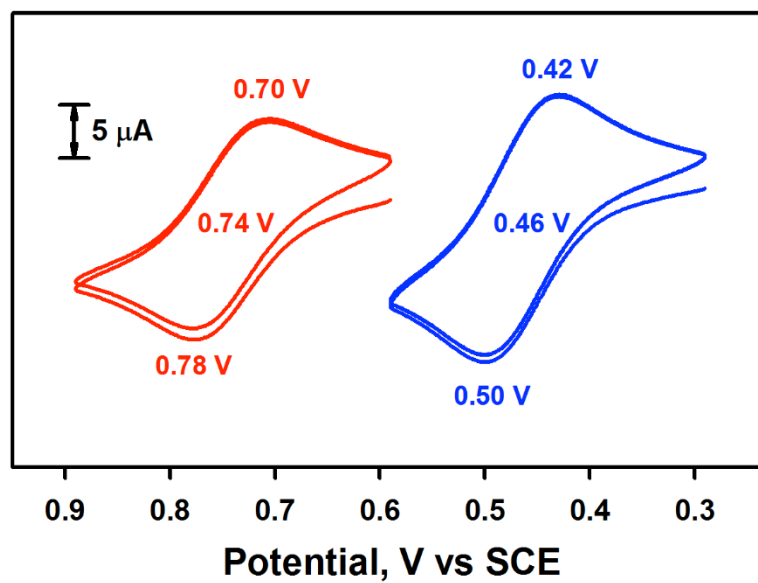

**Figure S15.** Cyclic voltammograms of  $[(\text{TPFC})\text{Mn}^{\text{III}}]$  (2.0 mM) in the absence (red line) and presence (blue line) of tetrabutylammonium chloride (TMACl, 2.0 mM) in  $\text{CH}_3\text{CN}$  at 25 °C.

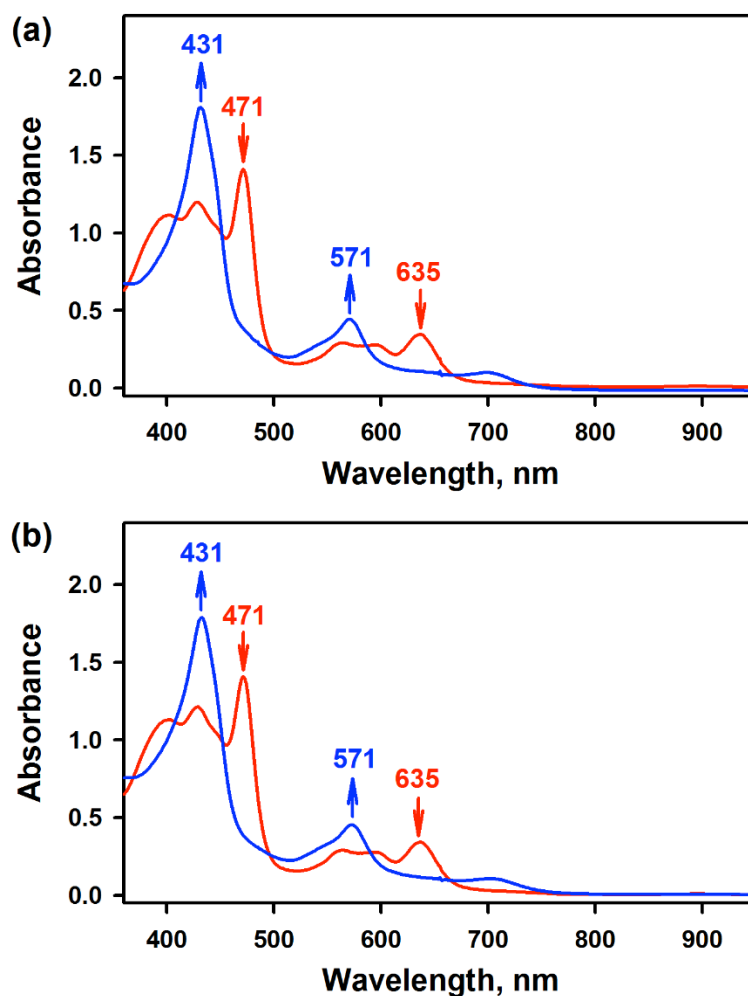

**Figure S16.** (a) UV-vis spectral changes observed in the immediate formation of **2** (blue line) upon addition of THF (0.12 M) to a  $\text{CH}_3\text{CN}$  solution of  $[(\text{TPFC})\text{Mn}^{\text{III}}(\text{OH})]^-$  (**3**) (0.030 mM, red line), which was produced by adding TMAH (0.60 mM) to a  $\text{CH}_3\text{CN}$  solution of  $[(\text{TPFC})\text{Mn}^{\text{III}}]$  (0.030 mM), under an air atmosphere at 25 °C. (b) UV-vis spectral changes observed in the immediate formation of **2** (blue line) upon addition of cyclohexene (0.20 M) to a  $\text{CH}_3\text{CN}$  solution of  $[(\text{TPFC})\text{Mn}^{\text{III}}(\text{OH})]^-$  (**3**) (0.030 mM, red line), which was produced by adding TMAH (0.60 mM) to a  $\text{CH}_3\text{CN}$  solution of  $[(\text{TPFC})\text{Mn}^{\text{III}}]$  (0.030 mM), under an air atmosphere at 25 °C.

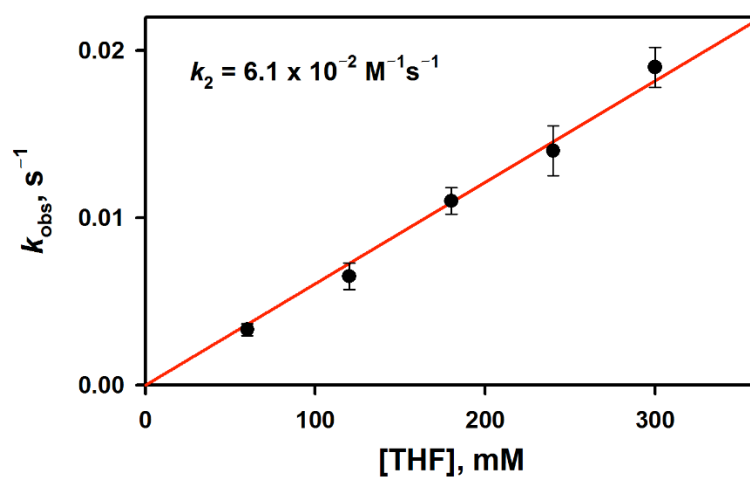

**Figure S17.** Plot of  $k_{\text{obs}}$  against THF concentration for the formation of **2** in the  $\text{O}_2$ -activation by  $[(\text{TPFC})\text{Mn}^{\text{III}}]$  (0.030 mM) with  $\text{O}_2$  in the presence of TMAH (0.60 mM) under an air atmosphere in  $\text{CH}_3\text{CN}$  at  $-20\text{ }^\circ\text{C}$  to determine the second-order rate constant,  $k_2$ .

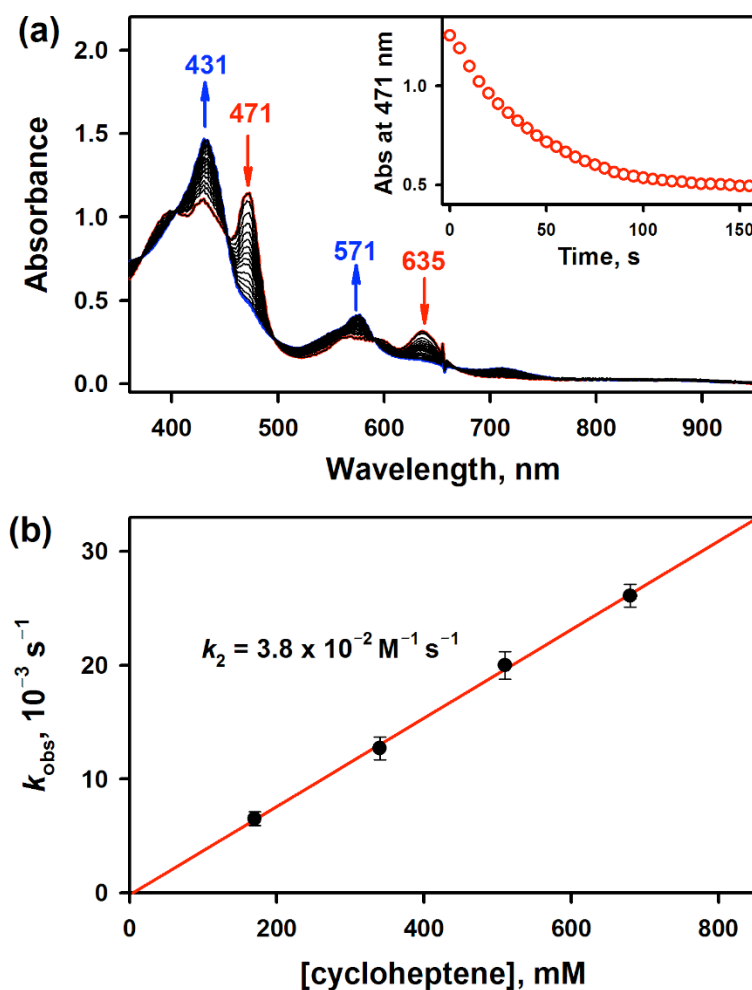

**Figure S18.** (a) UV-vis spectral changes observed in the formation of **2** (blue line) upon addition of cycloheptene (0.51 M) to a CH<sub>3</sub>CN solution of [(TPFC)Mn<sup>III</sup>(OH)]<sup>−</sup> (**3**) (0.030 mM, red line), which was produced by adding TMAH (0.60 mM) to a CH<sub>3</sub>CN solution of [(TPFC)Mn<sup>III</sup>] (0.030 mM), under an air atmosphere at −20 °C. Inset shows the time course of absorbance monitored at 471 nm due to the decay of **3**. (b) Plot of  $k_{\text{obs}}$  against cycloheptene concentration for the formation of **2** in the O<sub>2</sub>-activation by [(TPFC)Mn<sup>III</sup>] (0.030 mM) with O<sub>2</sub> in the presence of TMAH (0.60 mM) under an air atmosphere in CH<sub>3</sub>CN at −20 °C to determine the second-order rate constant,  $k_2$ .

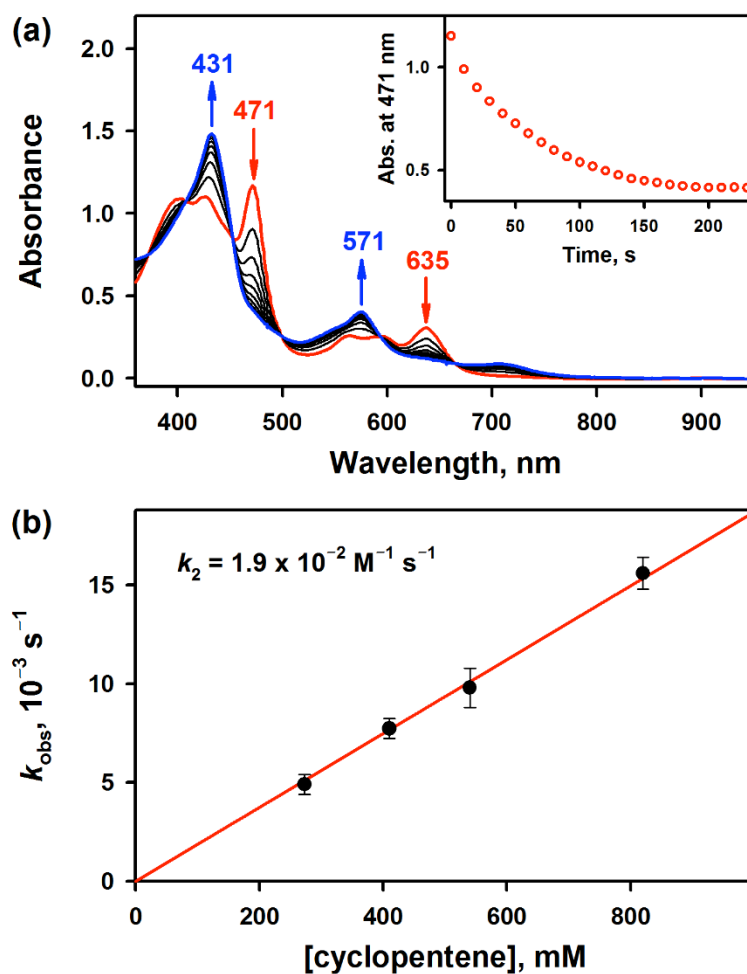

**Figure S19.** (a) UV-vis spectral changes observed in the formation of **2** (blue line) upon addition of cyclopentene (0.82 M) to a CH<sub>3</sub>CN solution of [(TPFC)Mn<sup>III</sup>(OH)]<sup>−</sup> (**3**) (0.030 mM, red line), which was produced by adding TMAH (0.60 mM) to a CH<sub>3</sub>CN solution of [(TPFC)Mn<sup>III</sup>] (0.030 mM), under an air atmosphere at −20 °C. Inset shows the time course of absorbance monitored at 471 nm due to the decay of **3**. (b) Plot of  $k_{\text{obs}}$  against cyclopentene concentration for the formation of **2** in the O<sub>2</sub>-activation by [(TPFC)Mn<sup>III</sup>] (0.030 mM) with O<sub>2</sub> in the presence of TMAH (0.60 mM) under an air atmosphere in CH<sub>3</sub>CN at −20 °C to determine the second-order rate constant,  $k_2$ .

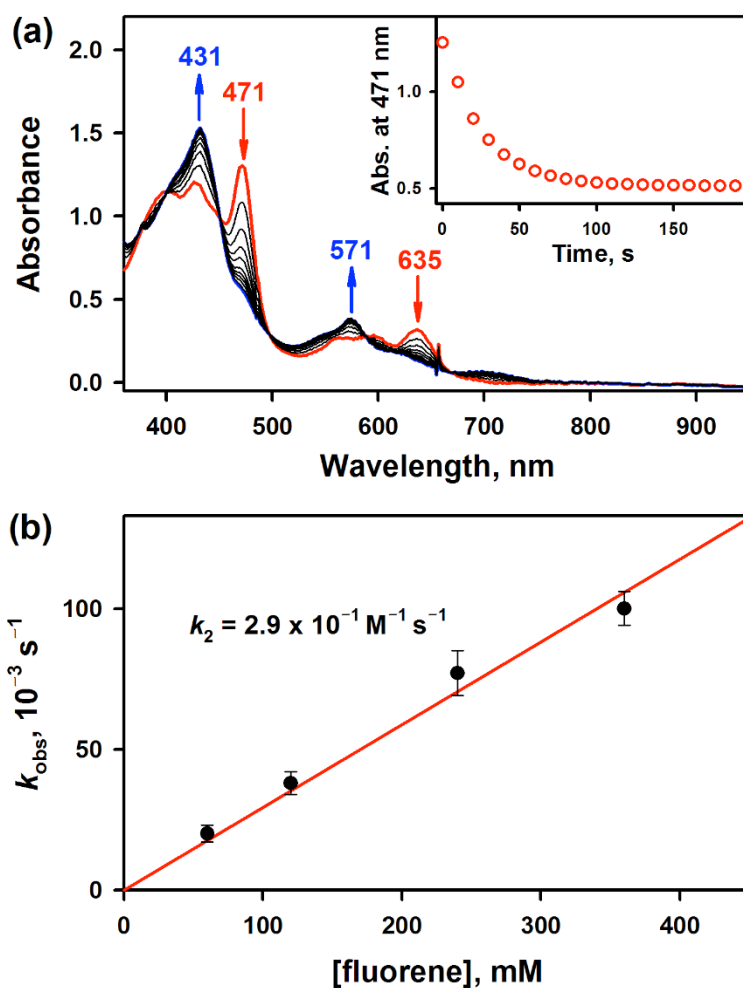

**Figure S20.** (a) UV-vis spectral changes observed in the formation of **2** (blue line) upon addition of fluorene (0.12 M) to a CH<sub>3</sub>CN solution of [(TPFC)Mn<sup>III</sup>(OH)]<sup>−</sup> (**3**) (0.030 mM, red line), which was produced by adding TMAH (0.60 mM) to a CH<sub>3</sub>CN solution of [(TPFC)Mn<sup>III</sup>] (0.030 mM), under an air atmosphere at −20 °C. Inset shows the time course of absorbance monitored at 471 nm due to the decay of **3**. (b) Plot of  $k_{\text{obs}}$  against fluorene concentration for the formation of **2** in the O<sub>2</sub>-activation by [(TPFC)Mn<sup>III</sup>] (0.030 mM) with O<sub>2</sub> in the presence of TMAH (0.60 mM) under an air atmosphere in CH<sub>3</sub>CN at −20 °C to determine the second-order rate constant,  $k_2$ .

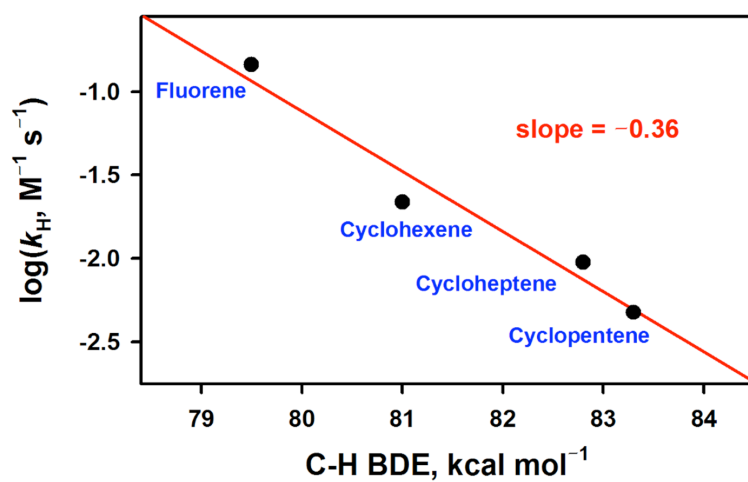

**Figure S21.** Plot of  $\log k_H$  vs BDE of substrate. The  $k_H$  values were obtained by dividing the second-order rate constants ( $k_2$ ) by the numbers of equivalent target C-H bonds in the substrates (i.e., 4 for cycloalkenes and 2 for fluorine). The slope in the linear correlation is  $0.36 \pm 0.04$ , which corresponds to the Bell-Evans-Polanyi  $\alpha$  value of  $0.42 \pm 0.05$ .

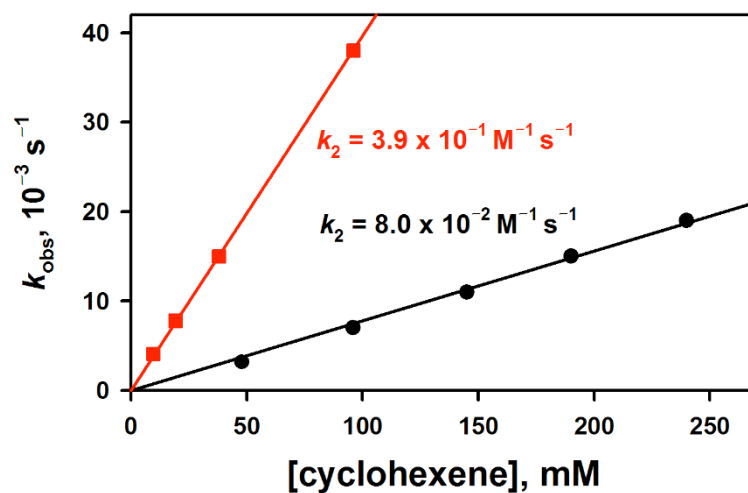

**Figure S22.** Plots of  $k_{\text{obs}}$  against cyclohexene concentration for the formation of **2** in the  $\text{O}_2$ -activation by  $[(\text{TPFC})\text{Mn}^{\text{III}}]$  (0.030 mM) in the presence of TMAH (0.60 mM) in air-saturated (black circles) and  $\text{O}_2$ -saturated (red squares)  $\text{CH}_3\text{CN}$  at  $-20^\circ\text{C}$  to determine the second-order rate constants,  $k_2$ . The formation rate constant in  $\text{O}_2$ -saturated  $\text{CH}_3\text{CN}$  is approximately 5 times larger than that in air-saturated  $\text{CH}_3\text{CN}$ .

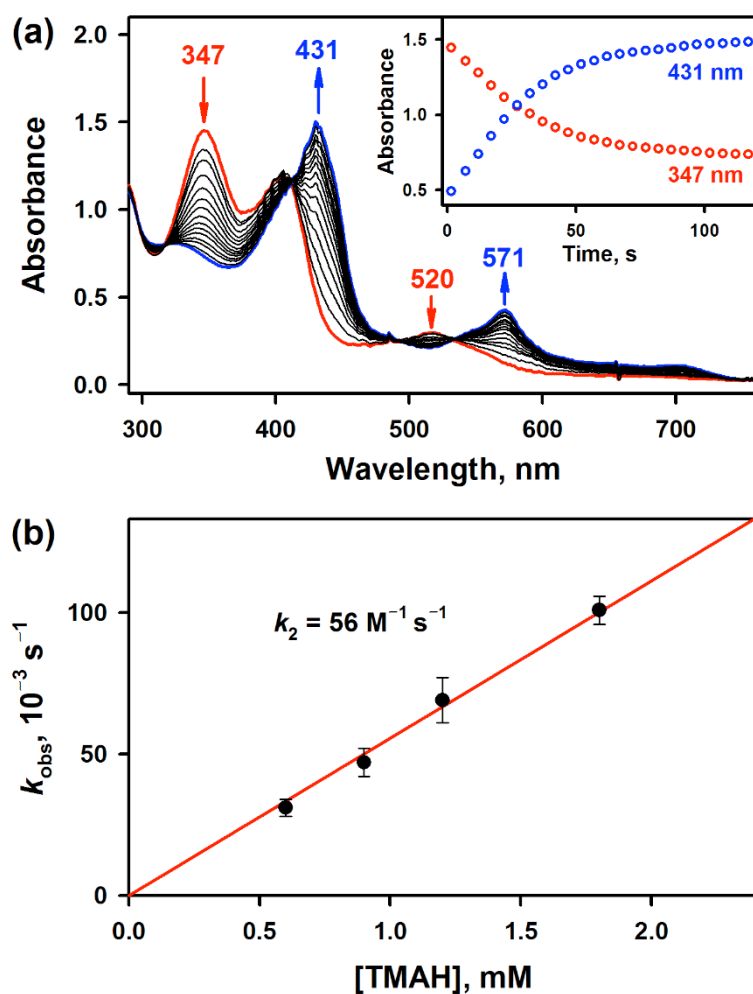

**Figure S23.** (a) UV-vis spectral changes observed for the conversion of **1** (0.030 mM, red line) to **2** (blue line) upon addition of TMAH (0.60 mM) to a CH<sub>3</sub>CN solution of **1** at -40 °C. **1** was generated by adding <sup>s</sup>PhIO (0.060 mM) to a CH<sub>3</sub>CN solution of [(TPFC)Mn<sup>III</sup>] (0.030 mM) at -40 °C. Inset shows the time course of absorbance monitored at 347 nm and 471 nm due to the decay of **1** and formation of **2**, respectively. (b) Plot of  $k_{\text{obs}}$  against TMAH concentration for the conversion of **1** (0.030 mM) to **2** in the presence of TMAH in CH<sub>3</sub>CN at -40 °C to determine the second-order rate constant,  $k_2$ .

## References

- (S1) Gross, Z.; Golubkov, G.; Simkhovich, L. *Angew. Chem., Int. Ed.* **2000**, *39*, 4045.
- (S2) Bougher, C. J.; Liu, S.; Hicks, S. D.; Abu-Omar, M. M. *J. Am. Chem. Soc.* **2015**, *137*, 14481.
